# Supplementary material for: Acidic ionic liquids: an alternative to HF for {001} reactive facet controlled synthesis of anatase titania
Source: Royal Society of Chemistry journal article supplement (doi:10.1039/c8nj01481g), 2018-01-01
Supplement: c8nj01481g1.pdf [file c8nj01481g1.pdf]

## Supporting Information

### Acidic Ionic Liquid: An Alternative to HF for {001} Reactive Facet Controlled Synthesis of Anatase Titania

Sofia Sandhu, Satwant Kaur Shahi, Vasundhara Singh \*

\*Department of Applied Sciences (Chemistry), Punjab Engineering College (Deemed to be University), Chandigarh-160012, India Tel: +91-9888222214; E-mail: [vasun7@yahoo.co.in](mailto:vasun7@yahoo.co.in)

TiO<sub>2</sub> with exposed {001} facets has an octahedral structure, its equilibrium shape can be seen as in (Fig. 1a), top view (Fig. 1b) and its cross section along [001] direction can be illustrated as in Fig. 1c. According to Scherrer formula, the average length (*l*) related to (200) peak and thickness (*d*) related to (004) peak can be calculated from the formula:

$$D = 0.89\lambda / \beta \cos \alpha$$

where,

*D* is the length or width,

$\lambda = 0.15406$  nm is the wavelength of X-ray,

$\beta$  is the full width half maximum (FWHM) of peaks, and

$\alpha$  is the diffraction angle.

The average length (*l*) can be obtained according to the values of FWHM and  $\alpha$  of (200) peak, and thickness (*d*) to (004) peak.

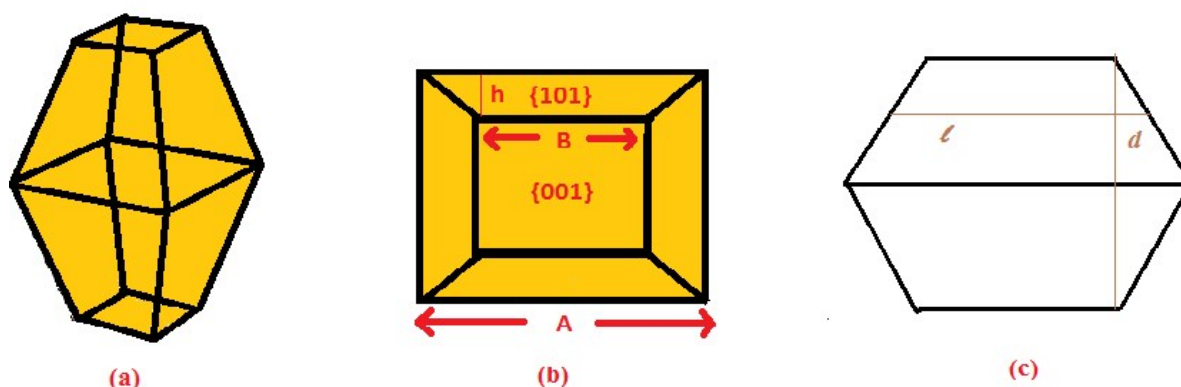

**Figure 1** (a) Equilibrium shape of anatase TiO<sub>2</sub> with exposed {001} facets (b) Top view of TiO<sub>2</sub> crystal with exposed {001} facets. (c) Cross section of [001] direction.

The calculation of the percentage of high reactive {001} facets is as follows:

$$B = l - \frac{d}{2} / \tan \theta$$

$$A = l + \frac{d}{2} / \tan \theta$$

$$h = \frac{d}{2} / \sin \theta$$

$$S_{(001)} = 2 \times B \times B = 2 \left( l - \frac{d}{2} / \tan \theta \right)^2 \quad (S_{(001)} \text{ is the area of all } \{001\} \text{ in a TiO}_2 \text{ single crystal})$$

$$S_{(101)} = 8 \times h \frac{A+B}{2} = 8hl = 4dl / \sin \theta \quad (S_{(101)} \text{ is the area of } \{101\} \text{ facets})$$

$$P_{(001)} = \frac{S_{(001)}}{S_{(001)} + S_{(101)}}$$

Here,  $\theta = 68.3^\circ$  is the theoretical value for the angle between [001] and [101] axes of anatase TiO<sub>2</sub>.

### Experimental data:

#### XRD Data of samples prepared by using AIL [Bmim]HSO<sub>4</sub>:

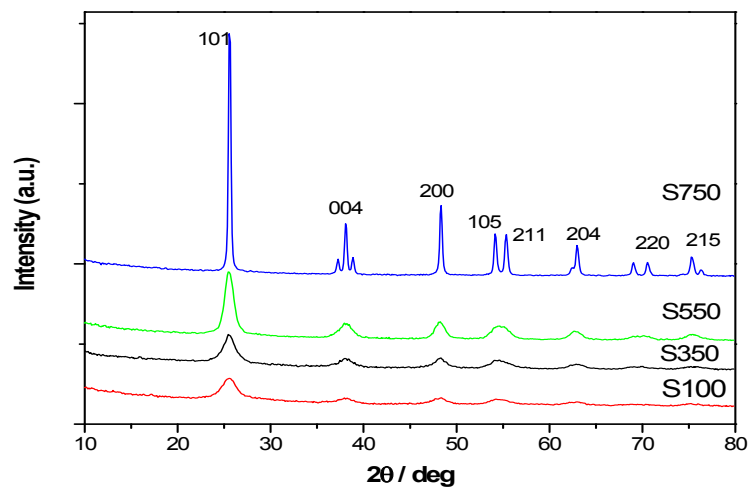

**Figure 2** XRD patterns of calcined TiO<sub>2</sub> nanoparticles synthesized via sol-gel method using AIL Bmim HSO<sub>4</sub>: (a) S100, (b) S350, (c) S550 and (d) S750

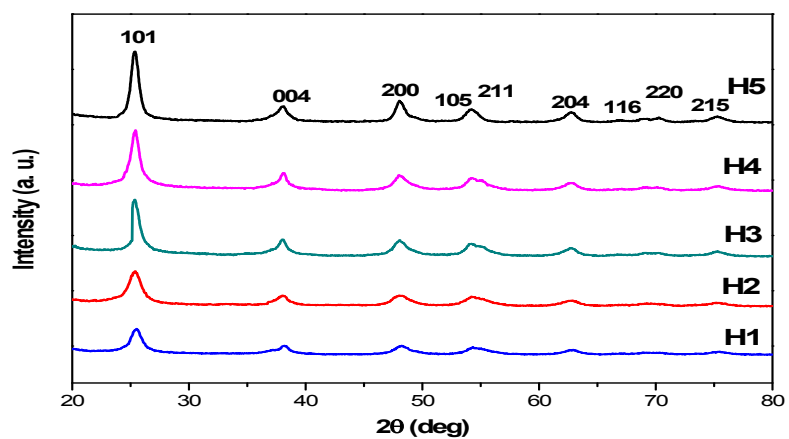

**Figure 3** XRD of TiO<sub>2</sub> synthesized via Hydrothermal method-Bmim HSO<sub>4</sub>

**TEM Images of samples synthesized using Bmim HSO<sub>4</sub> AIL:**

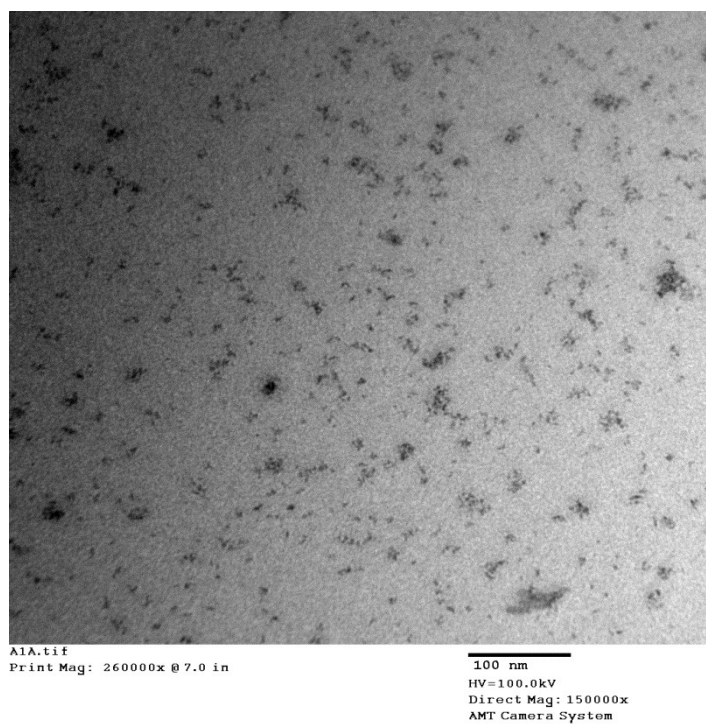

**(a) S100**

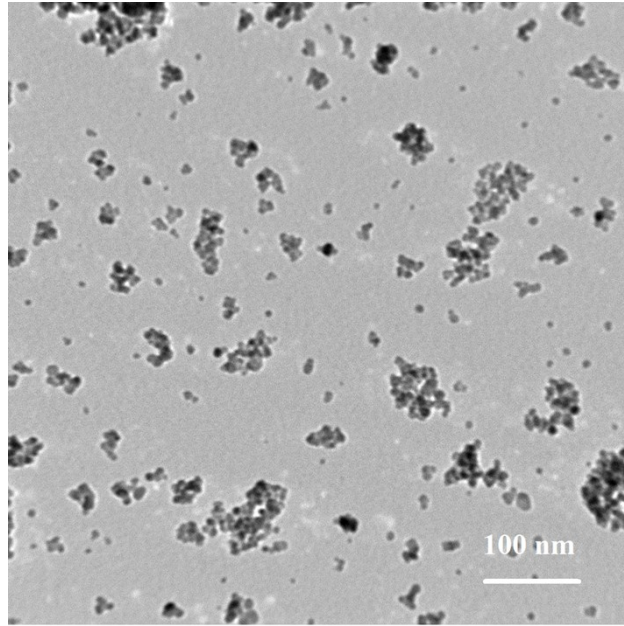

**(b) S350**

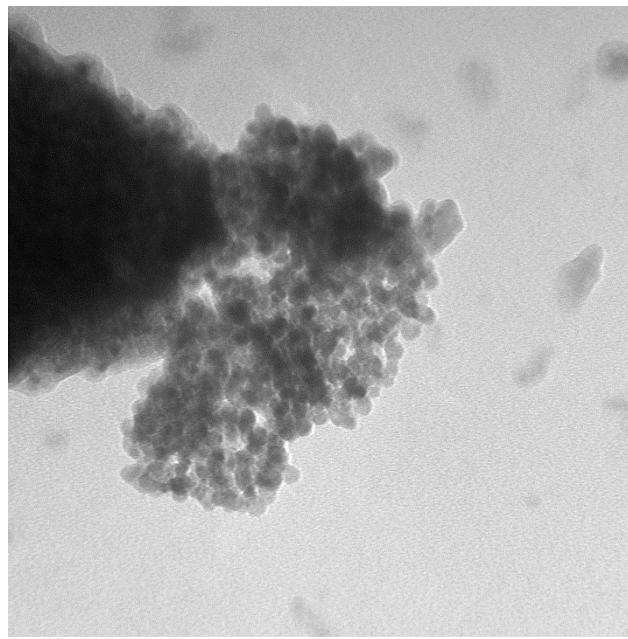

a2c.tif  
Print Mag: 521000x @ 7.0 in

20 nm  
HV=80.0kV  
Direct Mag: 300000x  
AMT Camera System

**(c) S550**

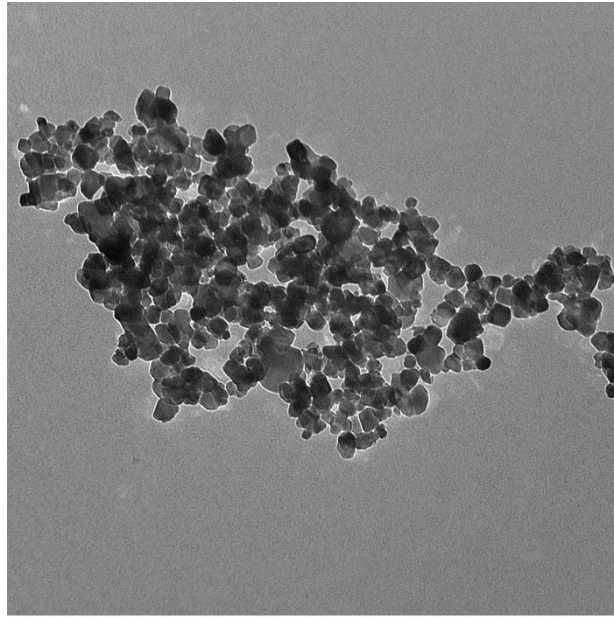

a3a.tif  
Print Mag: 139000x @ 7.0 in

100 nm  
HV=80.0kV  
Direct Mag: 80000x  
AMT Camera System

**(d) S750**

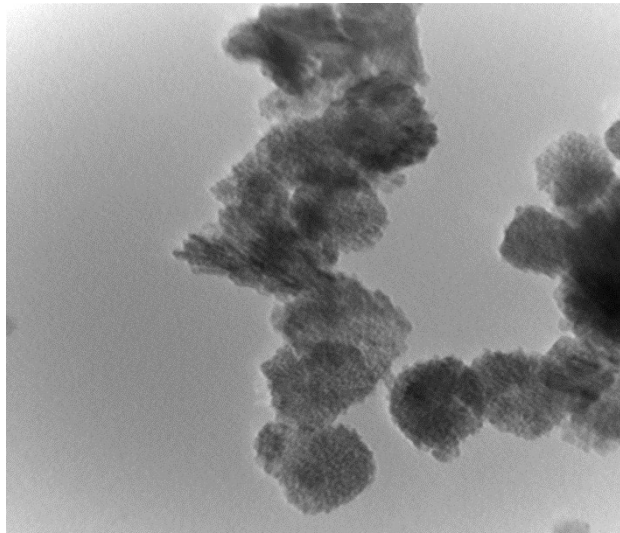

28-SK2.tif  
Print Mag: 521000x @ 7.0 in

20 nm  
HV=100.0kV  
Direct Mag: 300000x  
AMT Camera System

**(e) H-1**

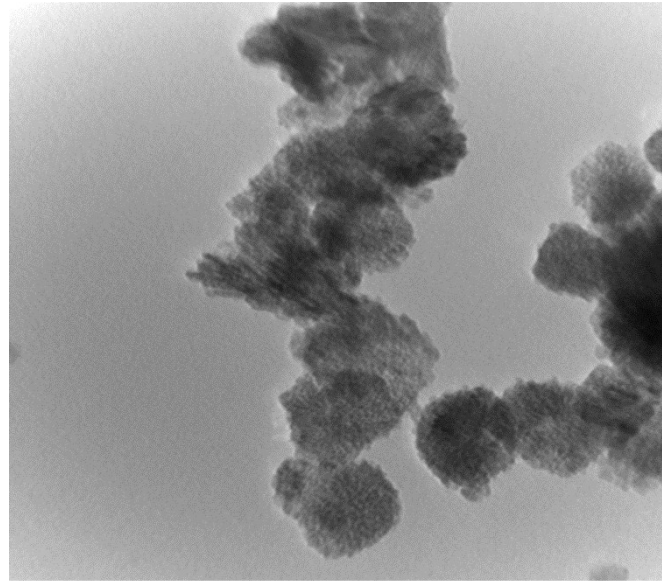

28-SK2.tif  
Print Mag: 521000x @ 7.0 in

20 nm  
HV=100.0kV  
Direct Mag: 300000x  
AMT Camera System

**(f) H-3**

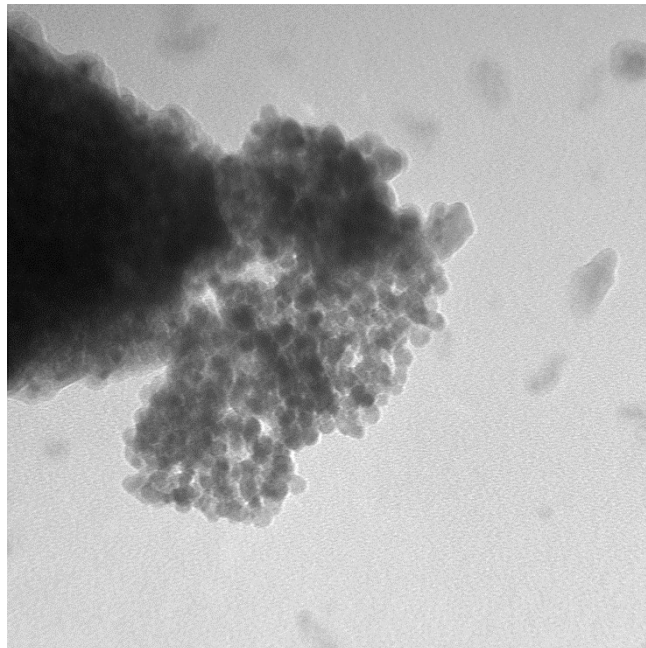

a2c.tif  
Print Mag: 521000x @ 7.0 in

20 nm  
HV=80.0kV  
Direct Mag: 300000x  
AMT Camera System

**(g) H-5**

### EDS Spectra of samples synthesized using Bmim HSO<sub>4</sub> AIL:

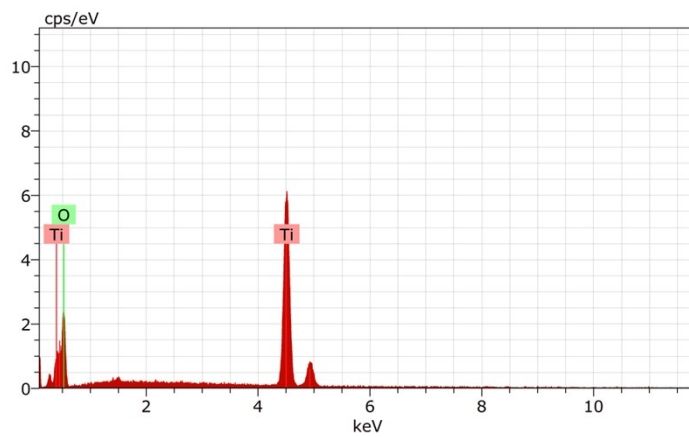

(a) S100

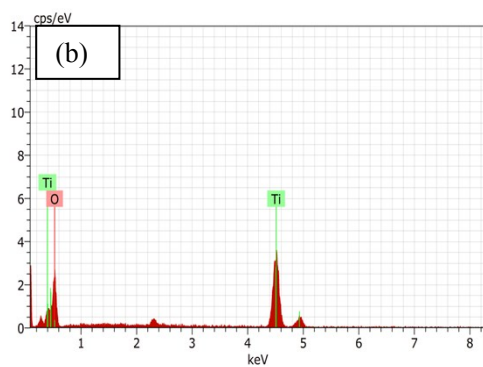

(b) H-1

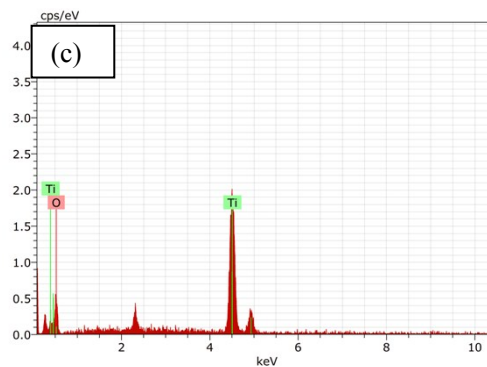

(c) H-3

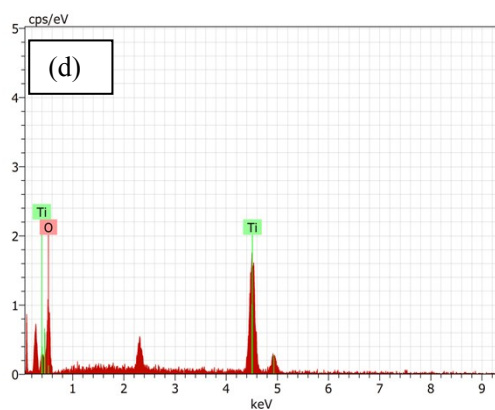

(d) H-5

### Photocatalytic Degradation Curves:

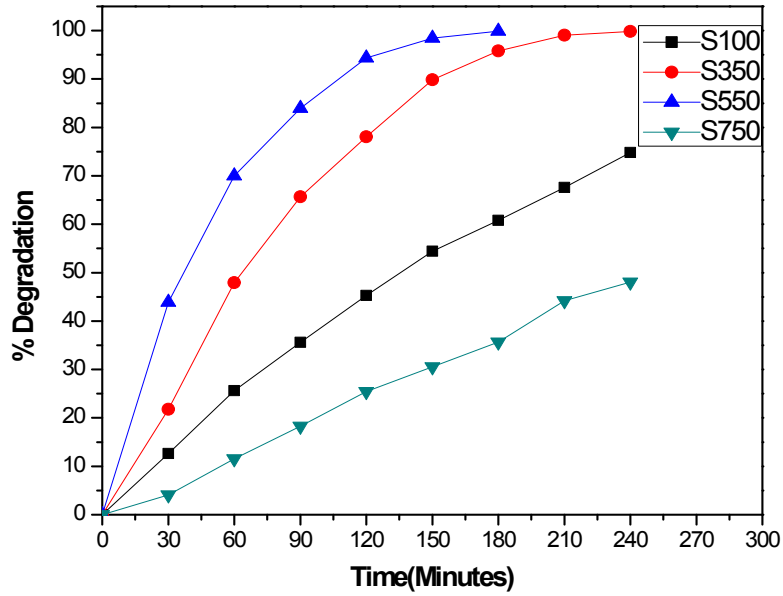

**Figure 4** Photocatalytic degradation using sol-gel synthesized titania using AIL [Bmim]HSO<sub>4</sub>

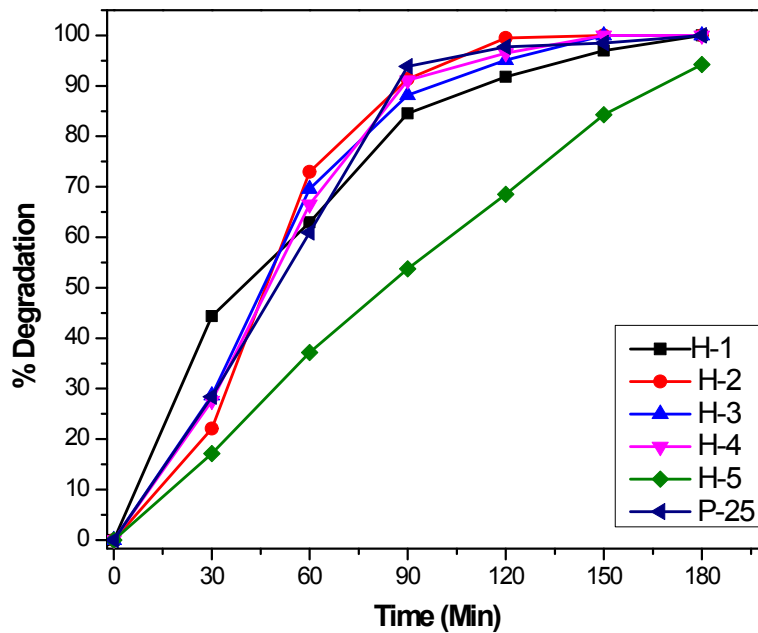

**Figure 5** Photocatalytic degradation using hydrothermally synthesized titania using AIL [Bmim]HSO<sub>4</sub>



**XRD Data of Titania samples prepared using AIL  $[\text{HO}_3\text{S}(\text{CH}_2)_3\text{MIM}][\text{CF}_3\text{SO}_3]$**

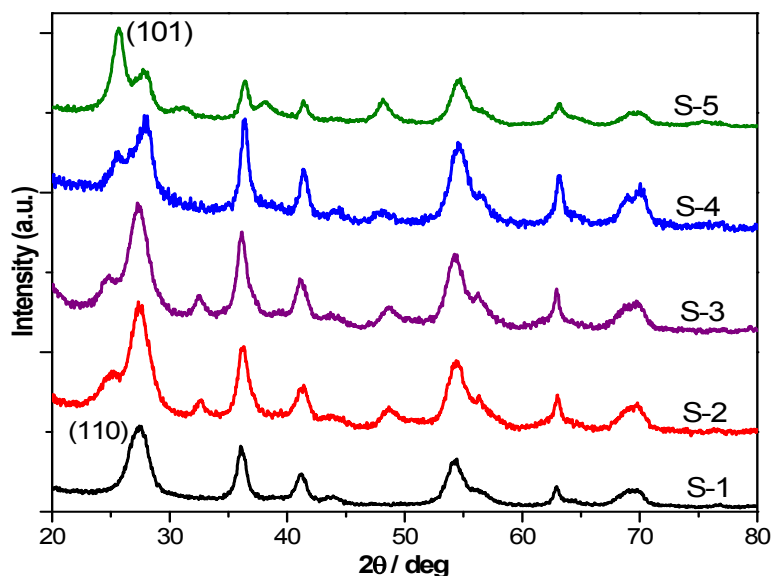

**Figure 6** XRD patterns of synthesized  $\text{TiO}_2$  via sol-gel method with different molar concentration of aqueous solution of AIL  $[\text{HO}_3\text{S}(\text{CH}_2)_3\text{MIM}][\text{CF}_3\text{SO}_3]$  : S-1 (2M), S-2 (1M), S-3 (0.5M), S-4 (0.1M), S-5 (0.01M).

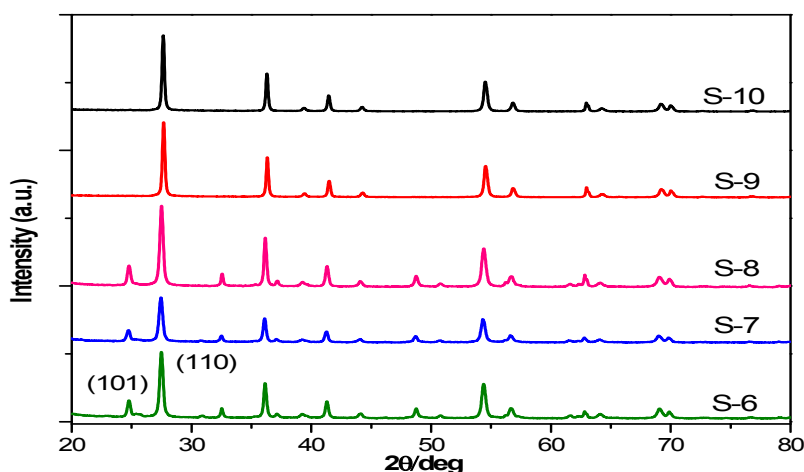

**Figure 7** XRD patterns of synthesized  $\text{TiO}_2$  via hydrothermal method with different molar concentration of aqueous solution of IL: S-6 (2M), S-7 (1M), S-8 (0.5M), S-9 (0.1M) and S-

10 (0.01M).

TEM images of samples prepared by using AIL  $[\text{HO}_3\text{S}(\text{CH}_2)_3\text{MIM}][\text{CF}_3\text{SO}_3]$ :

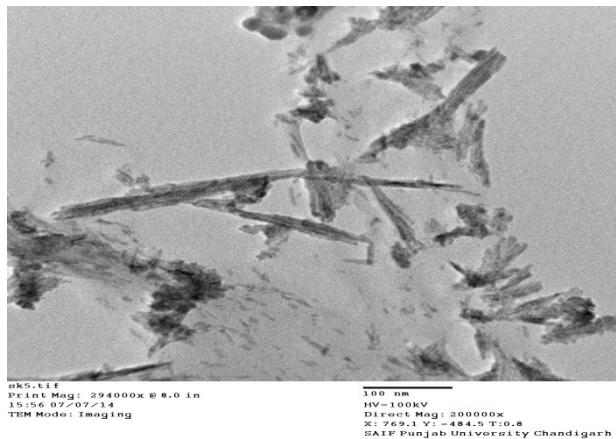

(a) S-1

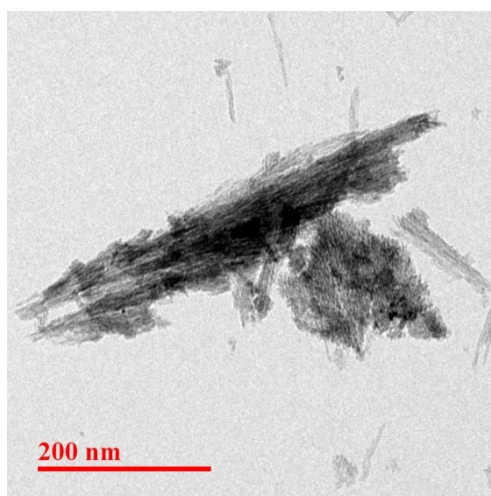

(b) S-3

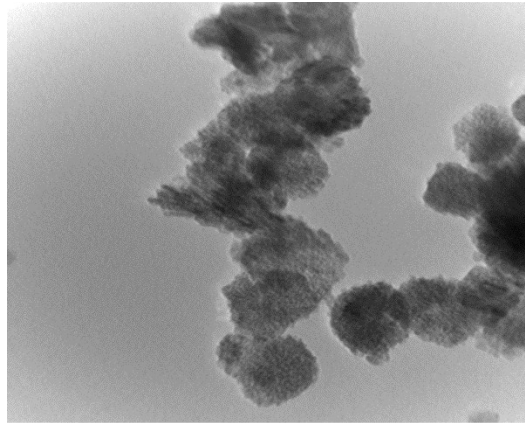

28-SK2.tif  
Print Mag: 521000x @ 7.0 in

20 nm  
HV=100.0kV  
Direct Mag: 300000x  
AMT Camera System

(c) S-5

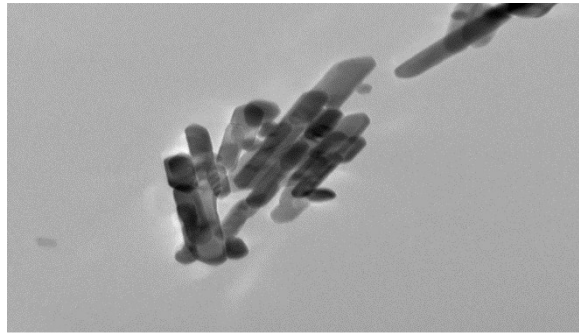

pk17c.tif  
Print Mag: 294000x @ 8.0 in  
15:47 07/07/14  
TEM Mode: Imaging

100 nm  
HV=100kV  
Direct Mag: 200000x  
X: 976.9 Y: -503 T:0.8  
SAIF Punjab University Chandigarh

(d) S-6

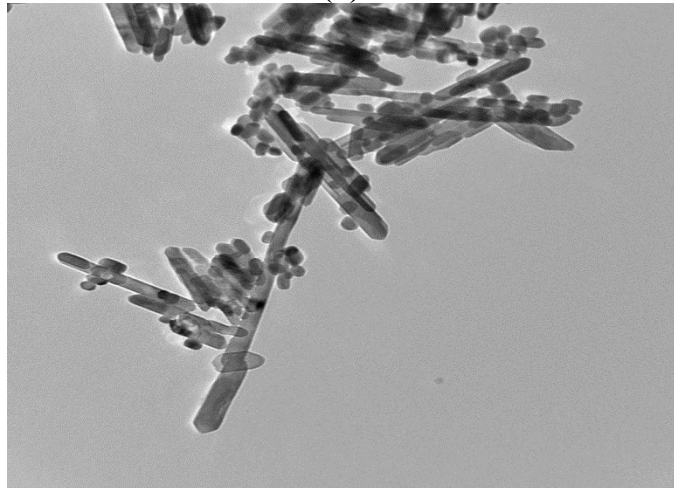

pk17f.tif  
Print Mag: 147000x @ 8.0 in  
15:51 07/07/14  
TEM Mode: Imaging

100 nm  
HV=100kV  
Direct Mag: 100000x  
X: 747.9 Y: -508.5 T:0.8  
SAIF Punjab University Chandigarh

(e) S-8

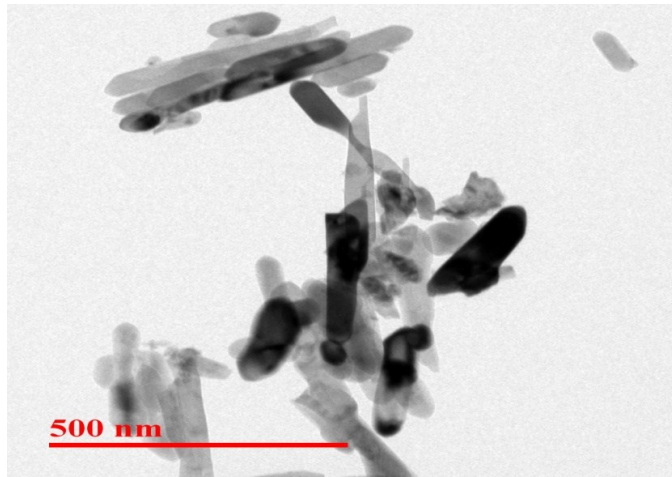

(f) S-10

EDS Spectra of samples prepared by using AIL  $[\text{HO}_3\text{S}(\text{CH}_2)_3\text{MIM}][\text{CF}_3\text{SO}_3]$ :

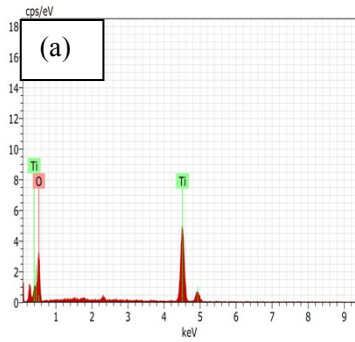

(a) S-1

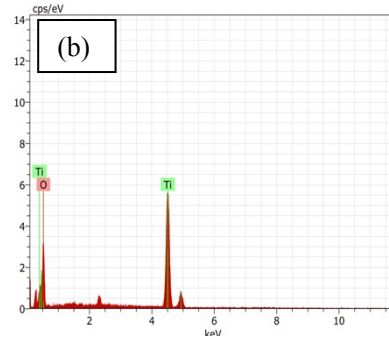

(b) S-3

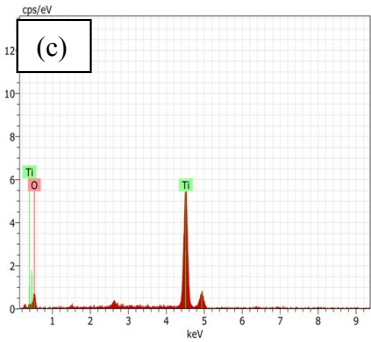

(c) S-5

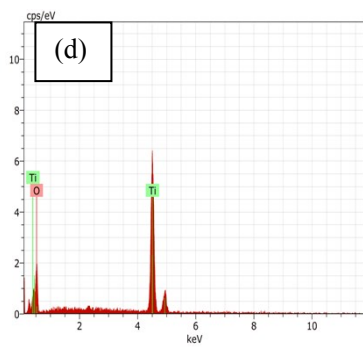

(d) S-6

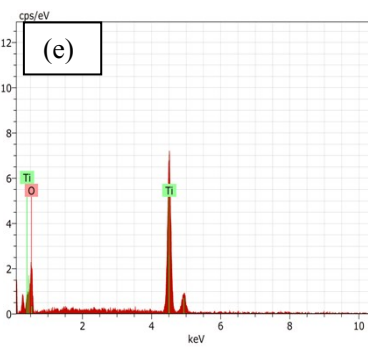

(e) S-8

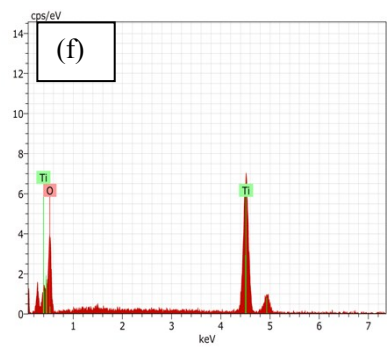

(f) S-10

**Photocatalytic degradation curve:**

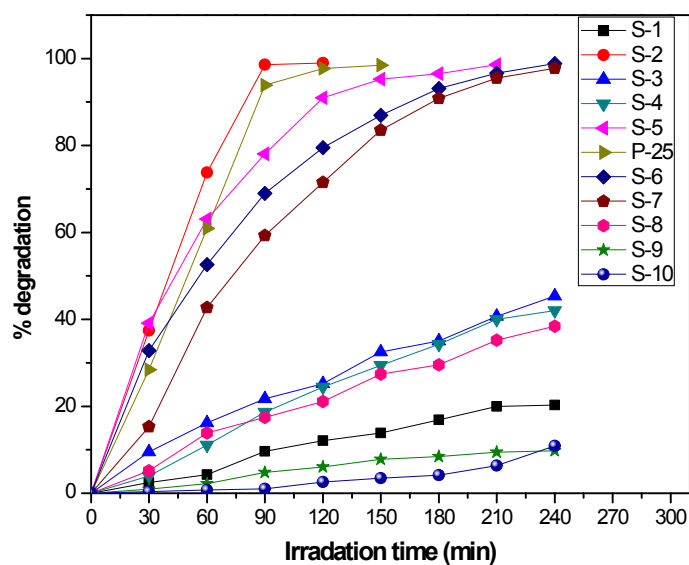

**Figure 8** Photocatalytic degradation of methyl orange dye % degradation versus irradiation time with TiO<sub>2</sub> samples (S-1 to S-10) and Degussa P-25.

**Table 1** Structural information of the anatase TiO<sub>2</sub> nanoparticles

| Samples | Average thickness (nm) | Average length (nm) | Percentage of {001} facet |
|---------|------------------------|---------------------|---------------------------|
| S100    | 0.09                   | 0.10                | 25.8                      |
| S350    | 0.09                   | 0.09                | 22.9                      |
| S550    | 0.09                   | 0.13                | 33.3                      |
| S750    | 0.49                   | 0.46                | 21.6                      |
| H-1     | 6.36                   | 10.16               | 36.2                      |
| H-2     | 7.48                   | 17.43               | 47.5                      |
| H-3     | 6.01                   | 5.48                | 20.5                      |
| H-4     | 9.75                   | 7.57                | 16.6                      |
| H-5     | 10.55                  | 6.76                | 12.3                      |
| S-5     | 6.69                   | 6.71                | 23.03                     |
| S-4C    | 29.91                  | 33.48               | 26                        |
| S-5C    | 25.37                  | 23.71               | 21.2                      |
| S-6     | 33.18                  | 32.60               | 22.4                      |
| S-7     | 37.08                  | 30.05               | 17.6                      |
| S-8     | 36.63                  | 22.99               | 11.9                      |

**Table 2** Comparative study of previous studies with the present report

| <b>Precursor and Fluorine source</b> | <b>Synthesis route and conditions</b> | <b>Morphology and Particle size</b>                                                                 | <b>{001} facet %</b>    | <b>Photocatalytic activity</b>                                                                                                               | <b>Ref.</b>    |
|--------------------------------------|---------------------------------------|-----------------------------------------------------------------------------------------------------|-------------------------|----------------------------------------------------------------------------------------------------------------------------------------------|----------------|
| Titanic acid nanobelts and HF        | Solvothermal; 200°C; 24h              | Nanosized                                                                                           | 40 to 77%               | Nanocrystals with 77% {001} facets exhibited high photocatalytic activity for photodegradation of MO, MB and RB                              | 33             |
| TiN and HF                           | Hydrothermal; 200°C; 18h              | Microsheets<br>Size:3.5µm                                                                           | 65%                     | Large visible light photocatalytic activity for CO <sub>2</sub> reduction                                                                    | 34             |
| TTIP and [bmin][BF <sub>4</sub> ]    | Hydrothermal; 200°C; 24h              | Cubic anatase<br>Size:<br>100±13nm                                                                  | 25% {001} and 75% {100} | Higher photocatalytic CO <sub>2</sub> reduction                                                                                              | 30             |
| TBT and HF                           | Hydrothermal, 200°C, 24h              | Nanosheets to nanoparticles<br>Size: along [001] direction-10-80nm<br>Along [100] direction-30-85nm | 89-64%                  | Photocatalytic degradation of acetone in air. The rate constant exceeded by a factor of 2.1                                                  | 18             |
| TBT and HF                           | Hydrothermal; 180/200°C; 24h          | Nanosheets<br>Size: 30-130nm                                                                        | 68-89%                  | TiO <sub>2</sub> nanosheets exhibited a gradually accelerating degradation rate and are more efficient than P25 TiO <sub>2</sub>             | 17             |
| TBT and HF                           | Hydrothermal, 180°C, 24h              | Nanosheets<br>Size:50-100nm                                                                         | 61-78%                  | TiO <sub>2</sub> with 70% {001} facet exhibited highest photocatalytic activity for photocatalytic oxidation decomposition of acetone in air | 35             |
| TiCl <sub>4</sub> and AILs           | Sol-gel and hydrothermal              | Nanosized<br>Size: 4.5 to 36.5nm                                                                    | 11.5 to 47.5%           | TiO <sub>2</sub> with highest facet percentage exhibited higher photocatalytic activity in the degradation of methyl orange                  | Present report |
